# Supplementary material for: Determinants of responsiveness to multidisciplinary chronic pain management interventions: protocol for a systematic review and meta-analysis
Source: HighWire-hosted journal article supplement (doi:10.1136/bmjopen-2021-057481), 2022-09-01
Supplement: bmjopen-2021-057481supp001_data_supplement.pdf [file bmjopen-2021-057481supp001_data_supplement.pdf]

Determinants of responsiveness to multidisciplinary chronic pain management interventions: protocol for a systematic review and meta-analysis

## Appendix A. Search Strategy

### Ovid MEDLINE

Fields: Title, Abstract, Subject heading word, Keyword heading word

(chronic pain OR persistent pain OR prolonged pain OR long-lasting pain OR intermittent pain OR long-term pain OR generalized pain OR widespread pain OR diffuse pain OR constant pain OR interfering pain OR intractable pain)

AND

(predictor\* OR prognostic\* OR determinant\* OR responsivity or responsive\* OR forecasting OR probability OR protective factor\* OR moderator\*)

AND

(multidisciplinary OR interdisciplinary OR multimodal OR interprofessional OR multiprofessional OR biopsychosocial)

AND

(program\* OR care team OR treatment approach\* OR treatment OR management OR rehabilitation OR intervention\* OR regimen\* OR therap\*)

AND

(outcome\* OR response\* OR improvement\* OR progress\* OR effect\*)

### Pubmed

Fields: Title/Abstract, MeSH Terms

(chronic pain OR persistent pain OR prolonged pain OR long-lasting pain OR intermittent pain OR long-term pain OR generalized pain OR widespread pain OR diffuse pain OR constant pain OR interfering pain OR intractable pain)

AND

(predictor\* OR prognostic\* OR determinant\* OR responsivity or responsive\* OR forecasting OR probability OR protective factor\* OR moderator\*)

AND

(multidisciplinary OR interdisciplinary OR multimodal OR interprofessional OR multiprofessional OR biopsychosocial)

AND

(program\* OR care team OR treatment approach\* OR treatment OR management OR rehabilitation OR intervention\* OR regimen\* OR therap\*)

AND

(outcome\* OR response\* OR improvement\* OR progress\* OR effect\*)

### **Ovid PsycINFO**

Fields: Title, Abstract, Heading word, MeSH word

(chronic pain OR persistent pain OR prolonged pain OR long-lasting pain OR intermittent pain OR long-term pain OR generalized pain OR widespread pain OR diffuse pain OR constant pain OR interfering pain OR intractable pain)

AND

(predictor\* OR prognostic\* OR determinant\* OR responsivity OR responsive\* OR forecasting OR probability OR protective factor\* OR moderator\*)

AND

(multidisciplinary OR interdisciplinary OR multimodal OR interprofessional OR multiprofessional OR biopsychosocial)

AND

(program\* OR care team OR treatment approach\* OR treatment OR management OR rehabilitation OR intervention\* OR regimen\* OR therap\*)

AND

(outcome\* OR response\* OR improvement\* OR progress\* OR effect\*)

### **Ebsco CINAHL**

Fields: Title, Abstract

(chronic pain OR persistent pain OR prolonged pain OR long-lasting pain OR intermittent pain OR long-term pain OR generalized pain OR widespread pain OR diffuse pain OR constant pain OR interfering pain OR intractable pain)

AND

(predictor\* OR prognostic\* OR determinant\* OR responsivity or responsive\* OR forecasting OR probability OR protective factor\* OR moderator\*)

AND

(multidisciplinary OR interdisciplinary OR multimodal OR interprofessional OR multiprofessional OR biopsychosocial)

AND

(program\* OR care team OR treatment approach\* OR treatment OR management OR rehabilitation OR intervention\* OR regimen\* OR therap\*)

AND

(outcome\* OR response\* OR improvement\* OR progress\* OR effect\*)

### Scopus

Fields: Title/Abstract/Keyword

(chronic pain OR persistent pain OR prolonged pain OR long-lasting pain OR intermittent pain OR long-term pain OR generalized pain OR widespread pain OR diffuse pain OR constant pain OR interfering pain OR intractable pain)

AND

(predictor\* OR prognostic\* OR determinant\* OR responsivity or responsive\* OR forecasting OR probability OR protective factor\* OR moderator\*)

AND

(multidisciplinary OR interdisciplinary OR multimodal OR interprofessional OR multiprofessional OR biopsychosocial)

AND

(program\* OR care team OR treatment approach\* OR treatment OR management OR rehabilitation OR intervention\* OR regimen\* OR therap\*)

AND

(outcome\* OR response\* OR improvement\* OR progress\* OR effect\*)
